# Supplementary material for: Solar-light-driven non-bias photoelectrolysis for bleach production from sea water and atmospheric oxygen
Source: Royal Society of Chemistry journal article supplement (doi:10.1039/c9se00557a), 2019-01-01
Supplement: c9se00557a1.pdf [file c9se00557a1.pdf]

*Supplementary Information*

**Solar-light-driven non-bias photoelectrolysis for bleach  
production from sea water and O<sub>2</sub> from the air**

**Corresponding authors**

Dr. Shoji IGUCHI and Dr. Kazuhiro SAYAMA

**List of the authors**

Shoji IGUCHI, Hiroyuki TATENO, Soichi TAKASUGI, Yugo MISEKI, and Kazuhiro  
SAYAMA

**Affiliation and full postal address**

Advanced Functional Materials Team, Research Center for Photovoltaics (RCPV),  
National Institute of Advanced Industrial Science and Technology (AIST), Central 5,  
1-1-1 Higashi, Tsukuba, Ibaraki, 305-8565 Japan.  
Tel: +81-29-861-4760, Fax: +81-29-861-4760

**Table S1** List of chemical contents contained in the artificial sea water MARINE ART SF-1 purchased from Osaka Yakken. Co. Ltd., Japan.

| Chemical           | Formula                                                           | Concentration<br>/ mg L <sup>-1</sup> |
|--------------------|-------------------------------------------------------------------|---------------------------------------|
| Sodium chloride    | NaCl                                                              | 22100                                 |
| Magnesium chloride | MgCl <sub>2</sub> ·6H <sub>2</sub> O                              | 9900                                  |
| Sodium sulfate     | Na <sub>2</sub> SO <sub>4</sub>                                   | 3900                                  |
| Calcium chloride   | CaCl <sub>2</sub> ·2H <sub>2</sub> O                              | 1500                                  |
| Potassium chloride | KCl                                                               | 610                                   |
| Sodium bicarbonate | NaHCO <sub>3</sub>                                                | 190                                   |
| Potassium bromide  | KBr                                                               | 96                                    |
| Borax              | Na <sub>2</sub> B <sub>4</sub> O <sub>7</sub> ·10H <sub>2</sub> O | 78                                    |
| Strontium chloride | SrCl <sub>2</sub>                                                 | 13                                    |
| Sodium fluoride    | NaF                                                               | 3                                     |

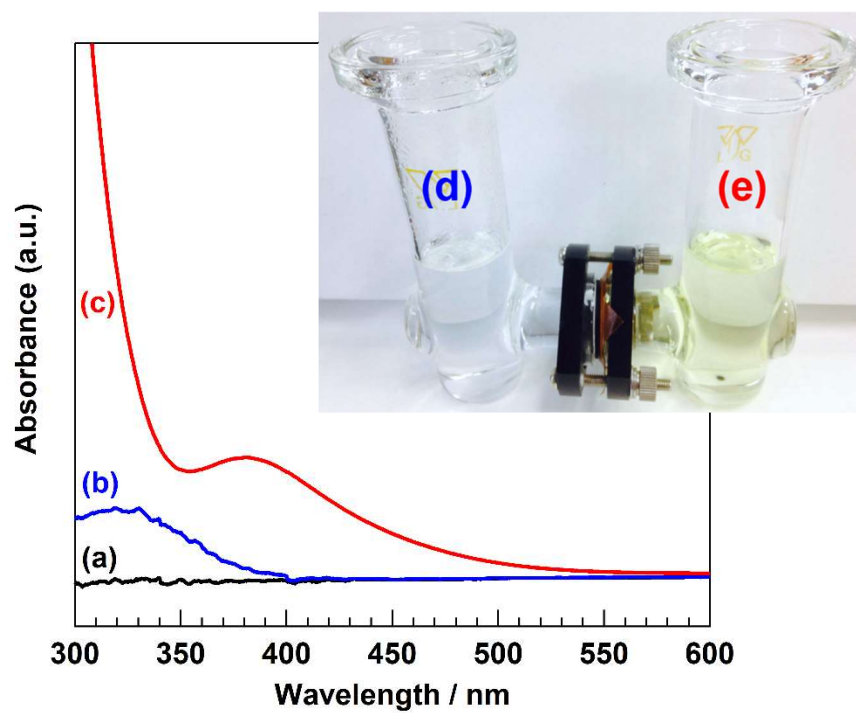

**Figure S1** Absorption spectra of (a) NaCl, (b) NaCl + HClO, and (c) NaCl + NaBr + HClO + HBrO, and color comparing of them (d) NaCl + HClO and (e) NaCl + NaBr + HClO + HBrO

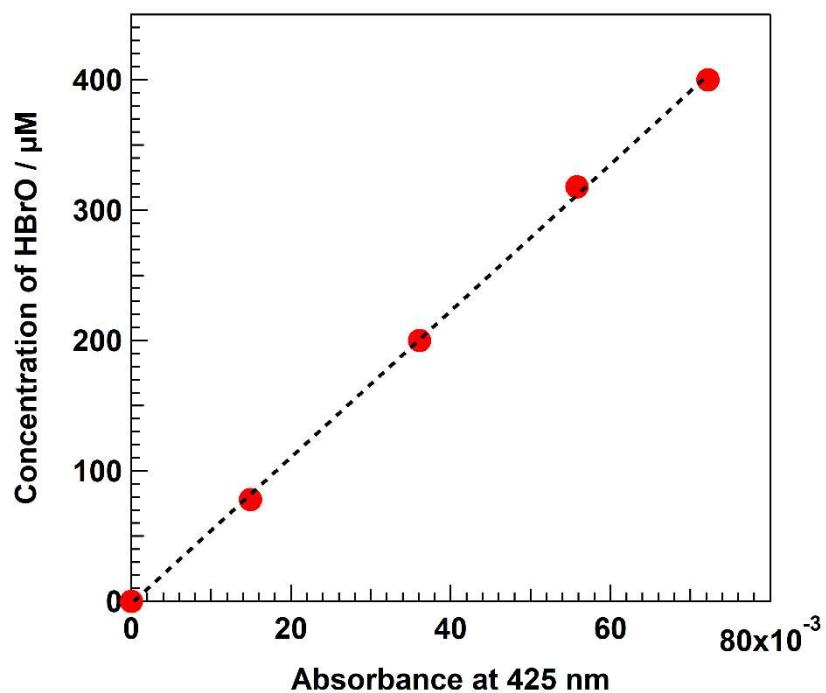

**Figure S2** Calibration curve for the determination of HBrO concentration containing in NaCl, NaBr, HClO, and HBrO mixed aqueous solution. Absorption coefficient was clearly influenced by the concentration of  $\text{Br}^-$ .

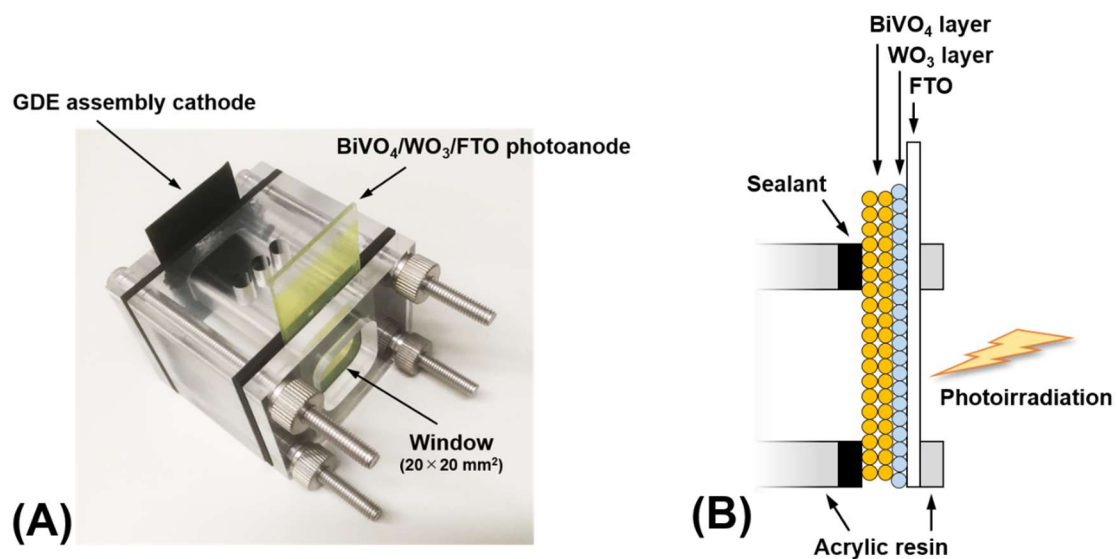

**Figure S3** (A) Photograph of one-chamber electrolysis cell (made from acrylic resin). Both sides of the cell were sealed by a photoanode (yellow plate) and a cathode (black sheet) themselves, respectively. (B) Schematic illustration of the photoanode side. The simulated solar light irradiates the BiVO<sub>4</sub>/WO<sub>3</sub>/FTO photoanode from backside (FTO side) through the square window (4 cm<sup>2</sup>).

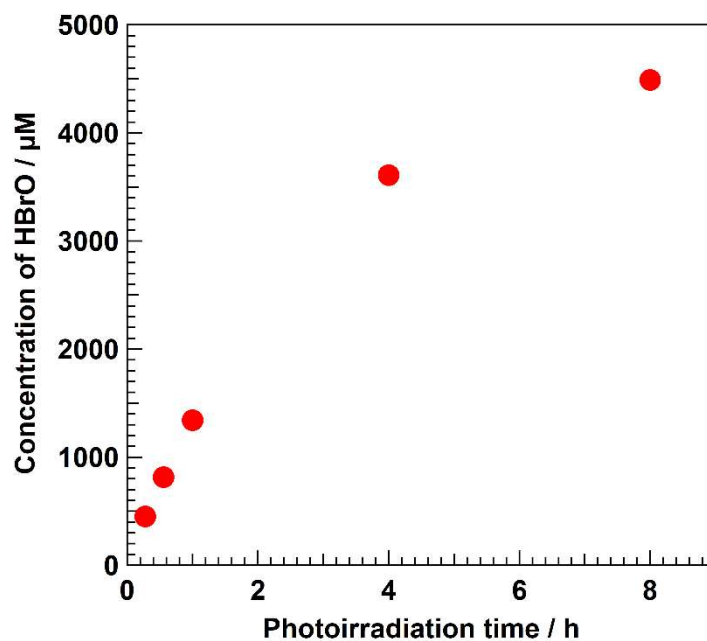

**Figure S4** Time course of the HBrO concentration produced in the electrolyte solution ( $C_{\text{HBrO}}$ ) during the photoelectrochemical reaction under solar light irradiation using 5.0 M NaBr as the electrolyte solution. Potentiostatic photoelectrolysis at +0.5 V vs. counter electrode. Light source: AM 1.5 simulated solar light. Anode:  $\text{BiVO}_4/\text{WO}_3/\text{FTO}$  12  $\text{cm}^2$ . Cathode: Pt wire ( $\text{O}_2$  atmosphere). Volume of anolyte solution: 35 mL.

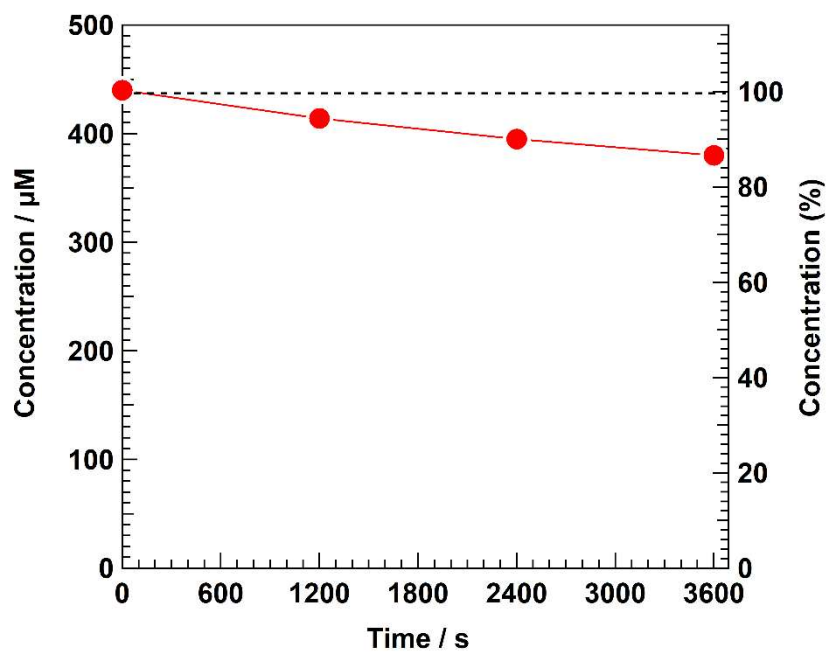

**Figure S5** Time dependence of the HBrO concentration in 5.0 M NaBr aqueous solution under reaction conditions (with irradiation and slight stirring).

**Table S2** Faradaic efficiency for HClO ( $FE_{\text{HClO}}$ ) and HBrO ( $FE_{\text{HBrO}}$ ) production in the photoelectrochemical oxidation of  $\text{Cl}^-$  and  $\text{Br}^-$  under solar light irradiation. Galvanostatic photoelectrolysis at 3.0 mA. Reaction time: 1000 s. Light source: AM 1.5 simulated solar light. Anode:  $\text{BiVO}_4/\text{WO}_3/\text{FTO}$  12  $\text{cm}^2$ . Cathode: Pt wire ( $\text{O}_2$  atmosphere).

| Electrolyte                   | $FE_{\text{HClO}}$ (%) | Electrolyte                   | $FE_{\text{HBrO}}$ (%) |
|-------------------------------|------------------------|-------------------------------|------------------------|
| Cl(200)ClO <sub>4</sub> (300) | 58                     | Br(200)ClO <sub>4</sub> (300) | 82                     |
| Cl(100)ClO <sub>4</sub> (400) | 41                     | Br(100)ClO <sub>4</sub> (400) | 82                     |
| Cl(10)ClO <sub>4</sub> (490)  | 4.8                    | Br(10)ClO <sub>4</sub> (490)  | 73                     |



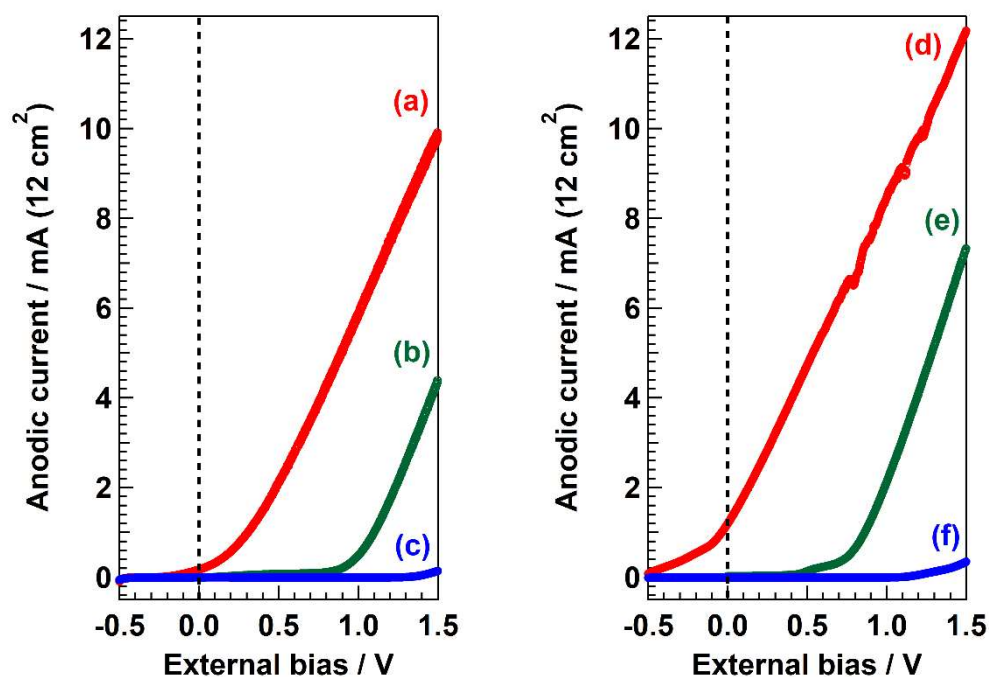

**Figure S6** Photocurrent-external bias curves of the (a, d) BiVO<sub>4</sub>/WO<sub>3</sub>/FTO photoelectrode (12 cm<sup>2</sup>), (b, e) Pt wire, and (c, f) FTO (12 cm<sup>2</sup>) under solar light irradiation using (a, b, c) Cl(50)ClO<sub>4</sub>(450) and (d, e, f) Br(50)ClO<sub>4</sub>(450) as the electrolyte solution. Cathode: Pt wire (O<sub>2</sub> atmosphere).

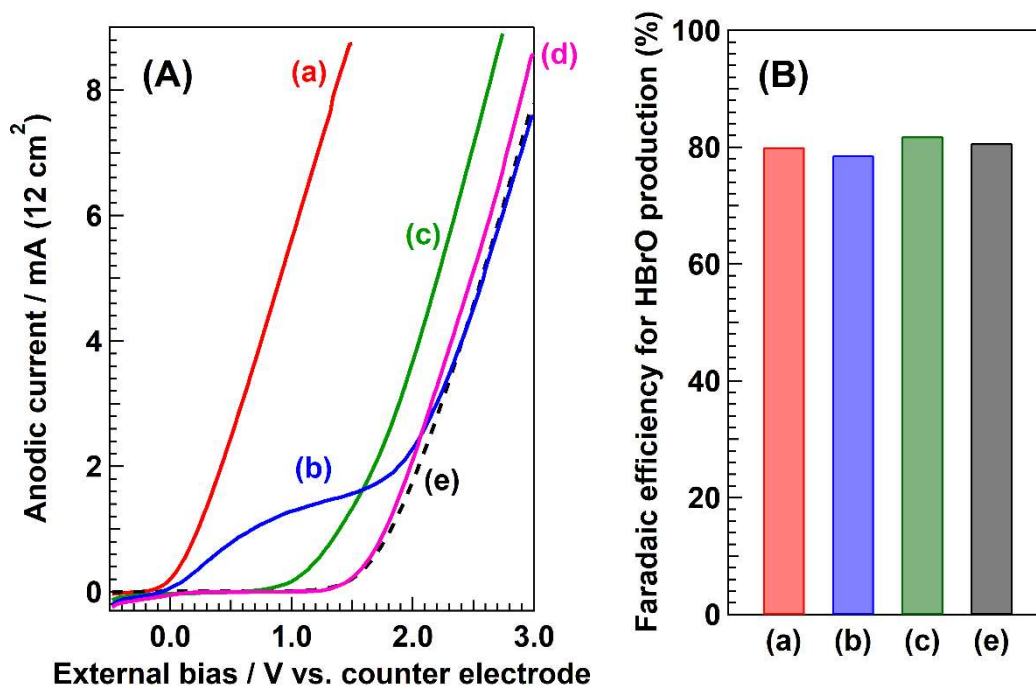

**Figure S7** (A) Current-external bias curves in **Br(50)ClO<sub>4</sub>(450)**, and (B)  $FE_{\text{HBrO}}$  in the galvanostatic photoelectrolysis at 3.0 mA for 1000 s using **Br(500)** electrolyte solution. (a) BiVO<sub>4</sub>/WO<sub>3</sub>/FTO, (b) WO<sub>3</sub>/FTO, (c) BiVO<sub>4</sub>/FTO, (d) FTO under solar light irradiation, and (e) BiVO<sub>4</sub>/WO<sub>3</sub>/FTO under dark condition. Anode: corresponding electrode 12 cm<sup>2</sup>. Cathode: Pt wire (O<sub>2</sub> atmosphere).

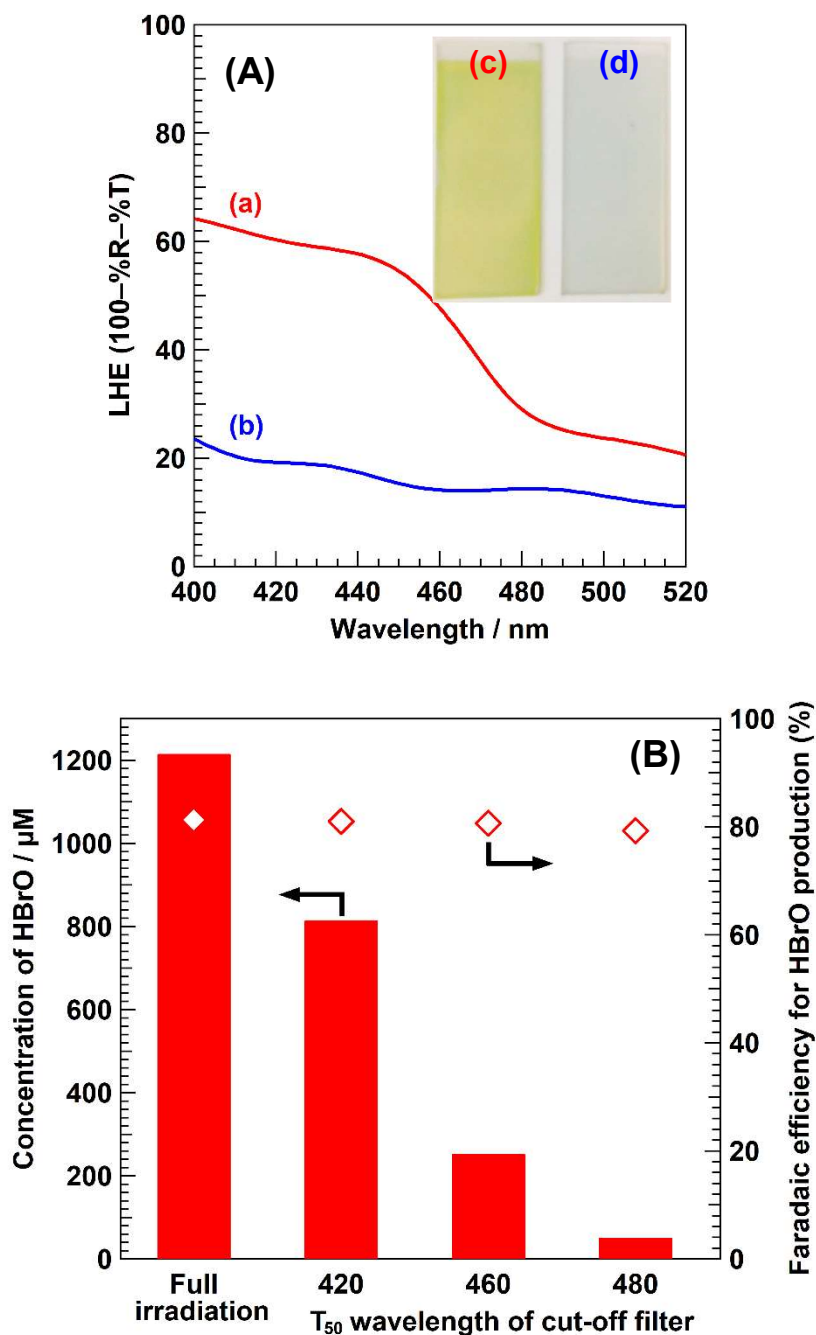

**Figure S8 (A)** Light harvesting efficiency (LHE) spectra of (a)  $\text{BiVO}_4/\text{WO}_3/\text{FTO}$  and (b)  $\text{WO}_3/\text{FTO}$  electrodes evaluated by transmittance (%T) and reflectance (%R), and photographs of (c)  $\text{BiVO}_4/\text{WO}_3/\text{FTO}$  and (d)  $\text{WO}_3/\text{FTO}$  electrodes. **(B)**  $C_{\text{HBrO}}$  and  $FE_{\text{HBrO}}$  in the potentiostatic photoelectrolysis using the  $\text{BiVO}_4/\text{WO}_3/\text{FTO}$  immersed in 5.0 M NaBr electrolyte solution under solar light irradiation with varied cut-off filter.

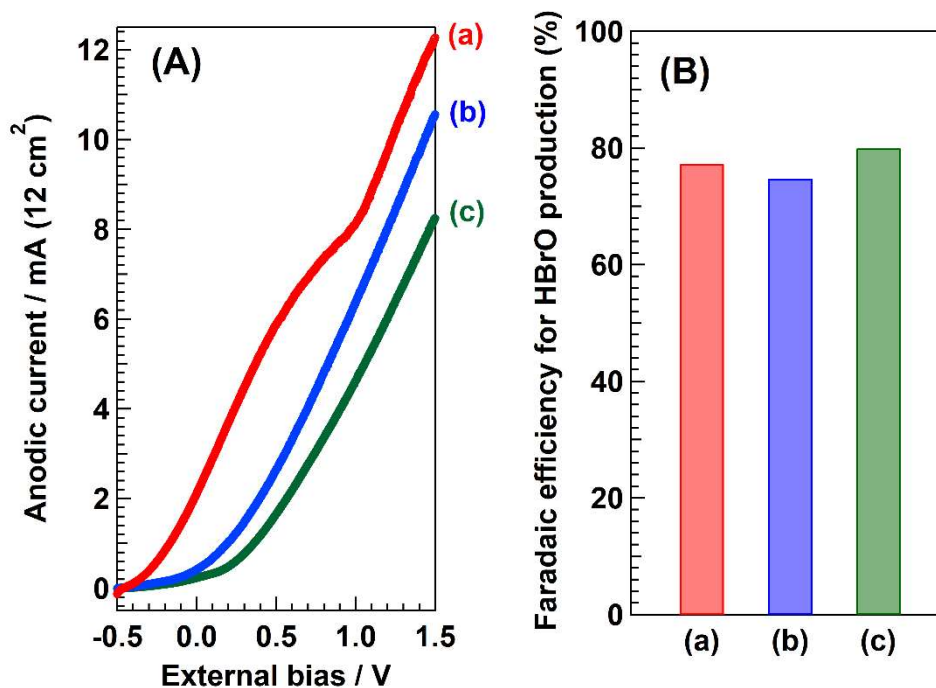

**Figure S9 (A)** Photocurrent-external bias curves of the BiVO<sub>4</sub>/WO<sub>3</sub>/FTO photoelectrode (12 cm<sup>2</sup>) under solar light irradiation using ClO<sub>4</sub>(500) as the electrolyte solution, and **(B)**  $FE_{\text{HBrO}}$  in the galvanostatic photoelectrolysis at 3.0 mA for 1000 s under solar light irradiation using Br(500) electrolyte solution. (a) undivided cell equipped with GDE cathode, (b) undivided cell using Pt wire cathode, and (c) divided cell with an ion exchange membrane using Pt wire cathode.

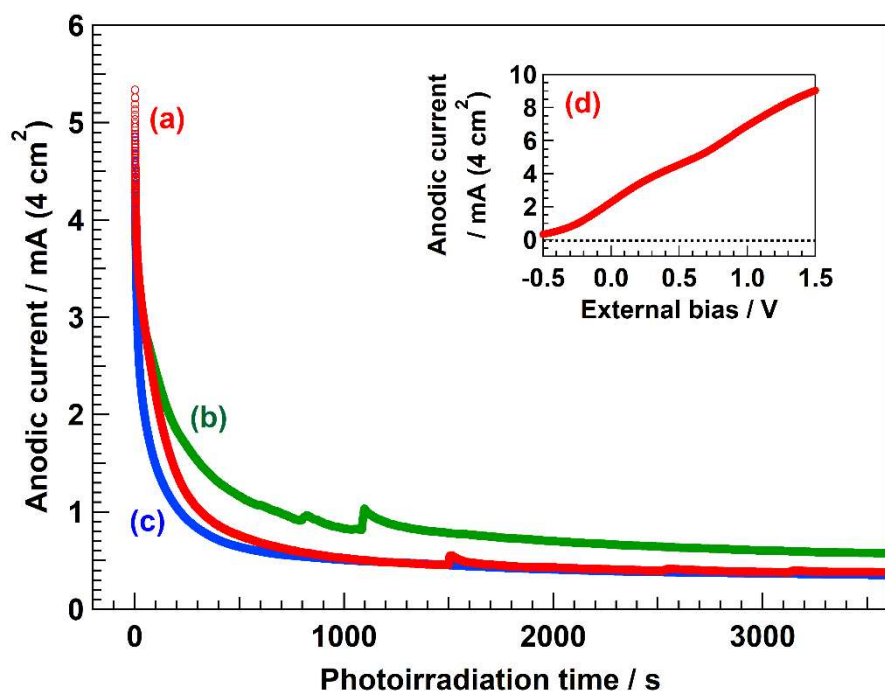

**Figure S10** Time course of the anodic photocurrent the  $\text{BiVO}_4/\text{WO}_3/\text{FTO}$  photoelectrode ( $4 \text{ cm}^2$ ) under solar light irradiation in non-bias bleach production from (a) artificial sea water, (b)  $\text{Br}(1)\text{Cl}(499)$ , and (c)  $\text{Cl}(500)$  electrolyte solution. undivided cell equipped with Pt/C loaded GDE cathode (as shown in Figure S3) using 13 mL of electrolyte solution. (d) I-V curve measured before the reaction of (a).

It can be considered that there are two reasons for rapid decrease in the photocurrent. (1) insufficient gas diffusion in the cathode, and/or (2) poisoning of Pt cathode catalyst by chloride and bromide ions.
